# Supplementary material for: Application of multinuclear magnetic resonance and gauge-including projector-augmented-wave calculations to the study of solid group 13 chlorides
Source: Royal Society of Chemistry journal article supplement (doi:10.1039/b906627f), 2009-01-01
Supplement: b906627f.pdf [file b906627f.pdf]

Electronic Supplementary Information

**Application of Multinuclear Magnetic Resonance and Gauge-Including Projector-Augmented Wave Calculations to the Study of Solid Group 13 Chlorides**

Rebecca P. Chapman and David L. Bryce\*

*\* Author to whom correspondence should be addressed.*

*Department of Chemistry and Centre for Catalysis Research and Innovation,  
University of Ottawa, Ottawa, Ontario K1N6N5, Canada*

*Fax: 613-562-5170; Tel: 613-562-5800 ext. 2018; E-mail: dbryce@uottawa.ca*

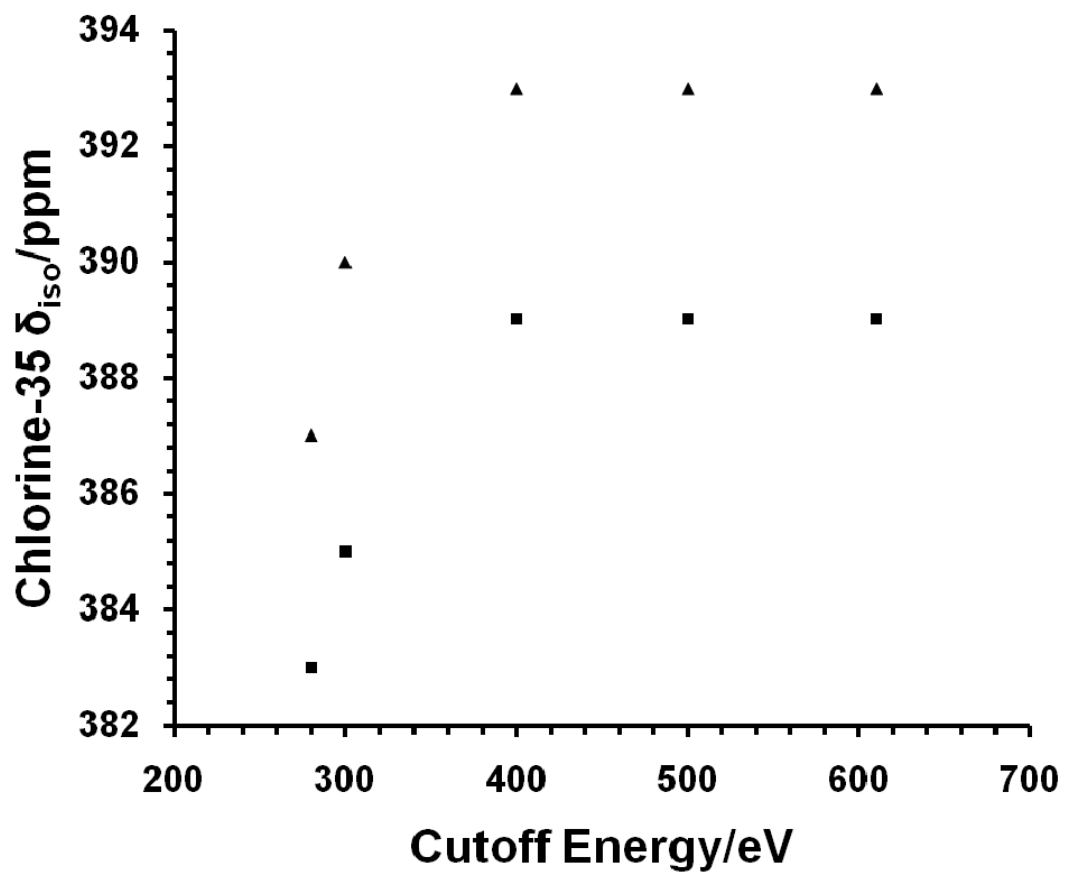

**Figure 1S.** Convergence of the chlorine chemical shift with increasing plane-wave cutoff energy, for  $\text{AlCl}_3$ . Site one: squares; site two: triangles. A cutoff energy of 610 eV was used for all calculations presented in the manuscript.

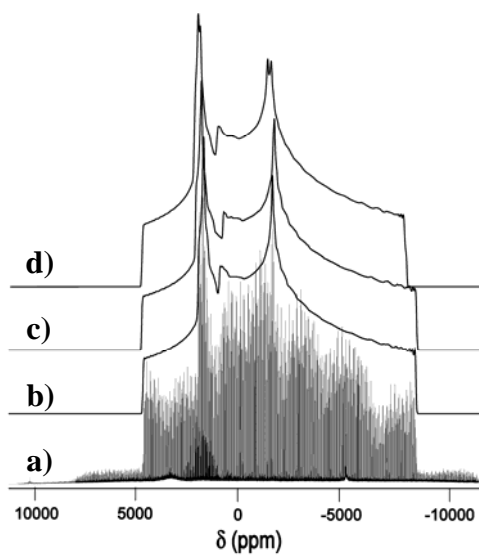

**Figure 2S.** Experimental and simulated solid-state chlorine-35 NMR spectra of aluminum trichloride at 21.1 T. Best-fit simulation is shown in (b), simulation assuming no CSA is shown in (c) and a simulation based on the GIPAW-DFT calculated parameters is shown in (d).

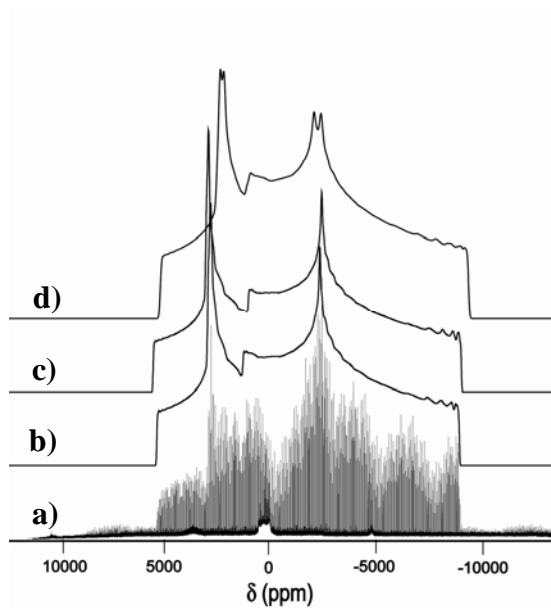

**Figure 3S.** Experimental and simulated solid-state chlorine-35 NMR spectra of indium trichloride at 21.1 T. Best-fit simulation is shown in (b), simulation assuming no CSA is shown in (c) and a simulation based on the GIPAW-DFT calculated parameters is shown in (d).

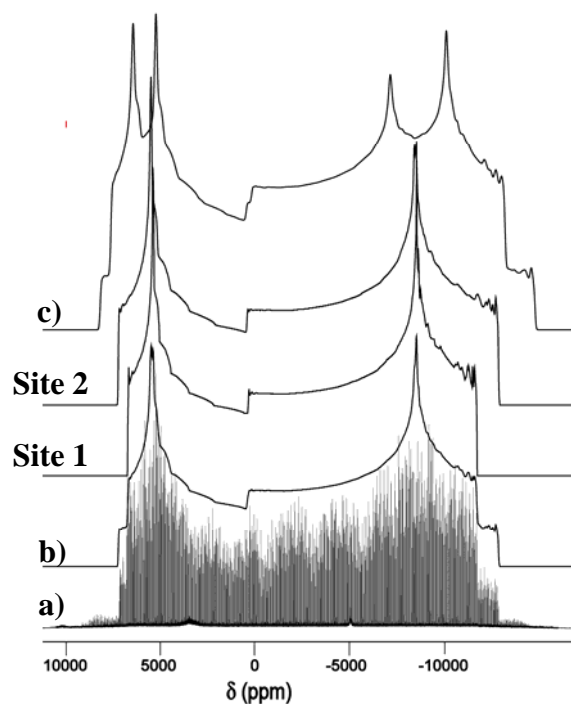

**Figure 4S.** Experimental and simulated solid-state chlorine-35 NMR spectra of gallium dichloride at 21.1 T. Best-fit simulation is shown in (b), with individual simulations of the two sites shown above. Simulation based on the GIPAW-DFT calculated parameters is shown in (c).

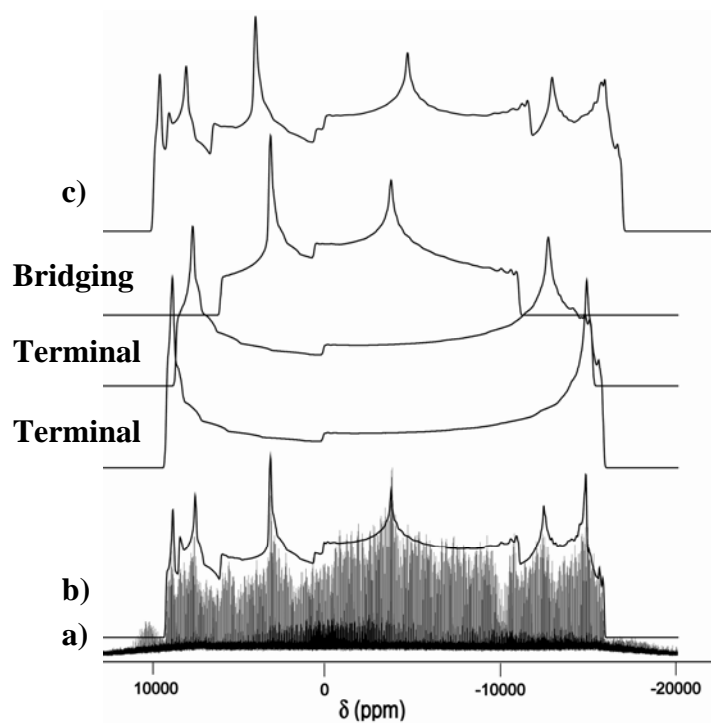

**Figure 5S.** Experimental and simulated solid-state chlorine-37 NMR spectra of gallium trichloride at 21.1 T. Best-fit simulations are shown in (b), with individual simulations of the three sites shown above. Simulation based on GIPAW-DFT calculated parameters is shown in (c).
